# Supplementary material for: Rational Design of Multifunctional Ferulic Acid Derivatives Aimed for Alzheimer’s and Parkinson’s Diseases
Source: MDPI journal article supplement (doi:10.3390/antiox12061256), 2023-06-11
Supplement: s1 [file s1]

# Supplementary Materials

## **Rational Design of Multifunctional Ferulic Acid Derivatives Aimed for Alzheimer's and Parkinson's diseases**

Eduardo Gabriel Guzmán-López,<sup>1</sup> Miguel Reina,<sup>2</sup> Luis Felipe Hernandez-Ayala,<sup>1</sup> and Annia Galano<sup>1\*</sup>

<sup>1</sup> *Departamento de Química, Universidad Autónoma Metropolitana-Iztapalapa, Av. Ferrocarril San Rafael Atlixco 186, Col. Leyes de Reforma 1A Sección, Alcaldía Iztapalapa, Mexico City 09310, Mexico.*

<sup>2</sup> *Departamento de Química Inorgánica y Nuclear, Facultad de Química, Universidad Nacional Autónoma de México, Mexico City 04510, Mexico.*

## Contents

|                                                                                                                                                                                                                                                                                                                                                                                                                                                                                            |    |
|--------------------------------------------------------------------------------------------------------------------------------------------------------------------------------------------------------------------------------------------------------------------------------------------------------------------------------------------------------------------------------------------------------------------------------------------------------------------------------------------|----|
| <b>Table S1.</b> Ferulic acid (FA) derivatives designed in this work. ....                                                                                                                                                                                                                                                                                                                                                                                                                 | 3  |
| <b>Table S2.</b> Values of the ADME properties: water/octanol partition coefficient (logP), topological polar surface area (PSA), number of heavy atoms ( <sup>X</sup> At), molecular weight (MW), number of H-bond acceptors (HBA), number of H-bond donors (HBD), rotatable bonds (RB), and molar refractivity (MR); toxicity descriptors: oral rat 50 percent lethal dose (LD50); Ames' mutagenicity (M); the synthetic accessibility (SA); and selection score (S <sup>S</sup> ). .... | 8  |
| <b>Table S3.</b> Elimination scores for the subset of ferulic acid derivatives chosen as the most promising, according to S <sup>S</sup> . ....                                                                                                                                                                                                                                                                                                                                            | 14 |
| <b>Table S4.</b> Reference set of molecules, with some neuroprotective effects. ....                                                                                                                                                                                                                                                                                                                                                                                                       | 15 |
| <b>Table S5.</b> Pole strength (PS) values for the EPT approximation (P3) used to calculate ionization energies and electron affinities. ....                                                                                                                                                                                                                                                                                                                                              | 17 |
| <b>Table S6.</b> Equations concerning S <sup>S</sup> construction. ....                                                                                                                                                                                                                                                                                                                                                                                                                    | 18 |
| <b>Table S7.</b> Exclusion scores (S <sup>E</sup> ) equations. ....                                                                                                                                                                                                                                                                                                                                                                                                                        | 19 |
| <b>Table S8.</b> Zero-point bond dissociation energies (BDE, in kcal/mol) for ferulic acid and its derivatives. Only the species with molar fractions $\geq 10^{-4}$ are included. ....                                                                                                                                                                                                                                                                                                    | 20 |
| <b>Table S9.</b> Binding energies ( $\Delta G_B$ , kcal/mol) for acid-base species of ferulic acid and its derivatives. ....                                                                                                                                                                                                                                                                                                                                                               | 21 |
| <b>Table S10.</b> Complete set of weighted binding energies ( $\Delta G^w_B$ , kcal/mol) for FA and its derivatives. ....                                                                                                                                                                                                                                                                                                                                                                  | 22 |
| <b>Figure S1.</b> Correlation between pKa values estimated with Marvin software vs experimentally pKa values. ....                                                                                                                                                                                                                                                                                                                                                                         | 23 |
| <b>Figure S2.</b> Redocking simulations of tolcapone in comt (left), Safrinamide in MAO-B (center) and Donopezil in AChE (right). ....                                                                                                                                                                                                                                                                                                                                                     | 24 |
| <b>Figure S3.</b> Deprotonation routes for the subset of ferulic acid derivatives chosen as the most promising, from their drug-like behavior. ....                                                                                                                                                                                                                                                                                                                                        | 25 |
| <b>Figure S4.</b> Distribution diagram of the acid-base species of ferulic acid derivatives. The vertical line landmarks the physiological pH (pH=7.4). ....                                                                                                                                                                                                                                                                                                                               | 26 |

**Table S1.** Ferulic acid (FA) derivatives designed in this work.

|       | R <sub>1</sub>  | R <sub>2</sub>  | R <sub>3</sub> | R <sub>4</sub>  | R <sub>5</sub>  |
|-------|-----------------|-----------------|----------------|-----------------|-----------------|
| FA    | H               | H               | H              | H               | H               |
| FA-1  | H               | H               | H              | COOH            | COOH            |
| FA-2  | H               | H               | H              | COOH            | NH <sub>2</sub> |
| FA-3  | H               | H               | H              | COOH            | OH              |
| FA-4  | H               | H               | H              | COOH            | SH              |
| FA-5  | H               | H               | H              | NH <sub>2</sub> | COOH            |
| FA-6  | H               | H               | H              | NH <sub>2</sub> | NH <sub>2</sub> |
| FA-7  | H               | H               | H              | NH <sub>2</sub> | OH              |
| FA-8  | H               | H               | H              | NH <sub>2</sub> | SH              |
| FA-9  | H               | H               | H              | OH              | COOH            |
| FA-10 | H               | H               | H              | OH              | NH <sub>2</sub> |
| FA-11 | H               | H               | H              | OH              | OH              |
| FA-12 | H               | H               | H              | OH              | SH              |
| FA-13 | H               | H               | H              | SH              | COOH            |
| FA-14 | H               | H               | H              | SH              | NH <sub>2</sub> |
| FA-15 | H               | H               | H              | SH              | OH              |
| FA-16 | H               | H               | H              | SH              | SH              |
| FA-17 | COOH            | H               | H              | H               | COOH            |
| FA-18 | COOH            | H               | H              | H               | NH <sub>2</sub> |
| FA-19 | COOH            | H               | H              | H               | OH              |
| FA-20 | COOH            | H               | H              | H               | SH              |
| FA-21 | NH <sub>2</sub> | H               | H              | H               | COOH            |
| FA-22 | NH <sub>2</sub> | H               | H              | H               | NH <sub>2</sub> |
| FA-23 | NH <sub>2</sub> | H               | H              | H               | OH              |
| FA-24 | NH <sub>2</sub> | H               | H              | H               | SH              |
| FA-25 | OH              | H               | H              | H               | COOH            |
| FA-26 | OH              | H               | H              | H               | NH <sub>2</sub> |
| FA-27 | OH              | H               | H              | H               | OH              |
| FA-28 | OH              | H               | H              | H               | SH              |
| FA-29 | SH              | H               | H              | H               | COOH            |
| FA-30 | SH              | H               | H              | H               | NH <sub>2</sub> |
| FA-31 | SH              | H               | H              | H               | OH              |
| FA-32 | SH              | H               | H              | H               | SH              |
| FA-33 | H               | COOH            | H              | H               | COOH            |
| FA-34 | H               | COOH            | H              | H               | NH <sub>2</sub> |
| FA-35 | H               | COOH            | H              | H               | OH              |
| FA-36 | H               | COOH            | H              | H               | SH              |
| FA-37 | H               | NH <sub>2</sub> | H              | H               | COOH            |
| FA-38 | H               | NH <sub>2</sub> | H              | H               | NH <sub>2</sub> |
| FA-39 | H               | NH <sub>2</sub> | H              | H               | OH              |

|       |      |     |      |      |      |
|-------|------|-----|------|------|------|
| FA-40 | H    | NH2 | H    | H    | SH   |
| FA-41 | H    | OH  | H    | H    | COOH |
| FA-42 | H    | OH  | H    | H    | NH2  |
| FA-43 | H    | OH  | H    | H    | OH   |
| FA-44 | H    | OH  | H    | H    | SH   |
| FA-45 | H    | SH  | H    | H    | COOH |
| FA-46 | H    | SH  | H    | H    | NH2  |
| FA-47 | H    | SH  | H    | H    | OH   |
| FA-48 | H    | SH  | H    | H    | SH   |
| FA-49 | H    | H   | COOH | H    | COOH |
| FA-50 | H    | H   | COOH | H    | NH2  |
| FA-51 | H    | H   | COOH | H    | OH   |
| FA-52 | H    | H   | COOH | H    | SH   |
| FA-53 | H    | H   | NH2  | H    | COOH |
| FA-54 | H    | H   | NH2  | H    | NH2  |
| FA-55 | H    | H   | NH2  | H    | OH   |
| FA-56 | H    | H   | NH2  | H    | SH   |
| FA-57 | H    | H   | OH   | H    | COOH |
| FA-58 | H    | H   | OH   | H    | NH2  |
| FA-59 | H    | H   | OH   | H    | OH   |
| FA-60 | H    | H   | OH   | H    | SH   |
| FA-61 | H    | H   | SH   | H    | COOH |
| FA-62 | H    | H   | SH   | H    | NH2  |
| FA-63 | H    | H   | SH   | H    | OH   |
| FA-64 | H    | H   | SH   | H    | SH   |
| FA-65 | H    | H   | H    | H    | COOH |
| FA-66 | H    | H   | H    | H    | NH2  |
| FA-67 | H    | H   | H    | H    | OH   |
| FA-68 | H    | H   | H    | H    | SH   |
| FA-69 | COOH | H   | H    | COOH | H    |
| FA-70 | COOH | H   | H    | NH2  | H    |
| FA-71 | COOH | H   | H    | OH   | H    |
| FA-72 | COOH | H   | H    | SH   | H    |
| FA-73 | NH2  | H   | H    | COOH | H    |
| FA-74 | NH2  | H   | H    | NH2  | H    |
| FA-75 | NH2  | H   | H    | OH   | H    |
| FA-76 | NH2  | H   | H    | SH   | H    |
| FA-77 | OH   | H   | H    | COOH | H    |
| FA-78 | OH   | H   | H    | NH2  | H    |
| FA-79 | OH   | H   | H    | OH   | H    |
| FA-80 | OH   | H   | H    | SH   | H    |
| FA-81 | SH   | H   | H    | COOH | H    |
| FA-82 | SH   | H   | H    | NH2  | H    |

|        |      |      |      |      |   |
|--------|------|------|------|------|---|
| FA-83  | SH   | H    | H    | OH   | H |
| FA-84  | SH   | H    | H    | SH   | H |
| FA-85  | H    | COOH | H    | COOH | H |
| FA-86  | H    | NH2  | H    | COOH | H |
| FA-87  | H    | OH   | H    | COOH | H |
| FA-88  | H    | SH   | H    | COOH | H |
| FA-89  | H    | H    | COOH | COOH | H |
| FA-90  | H    | H    | NH2  | COOH | H |
| FA-91  | H    | H    | OH   | COOH | H |
| FA-92  | H    | H    | SH   | COOH | H |
| FA-93  | H    | H    | H    | COOH | H |
| FA-94  | H    | COOH | H    | NH2  | H |
| FA-95  | H    | NH2  | H    | NH2  | H |
| FA-96  | H    | OH   | H    | NH2  | H |
| FA-97  | H    | SH   | H    | NH2  | H |
| FA-98  | H    | H    | COOH | NH2  | H |
| FA-99  | H    | H    | NH2  | NH2  | H |
| FA-100 | H    | H    | OH   | NH2  | H |
| FA-101 | H    | H    | SH   | NH2  | H |
| FA-102 | H    | H    | H    | NH2  | H |
| FA-103 | H    | COOH | H    | OH   | H |
| FA-104 | H    | NH2  | H    | OH   | H |
| FA-105 | H    | OH   | H    | OH   | H |
| FA-106 | H    | SH   | H    | OH   | H |
| FA-107 | H    | H    | COOH | OH   | H |
| FA-108 | H    | H    | NH2  | OH   | H |
| FA-109 | H    | H    | OH   | OH   | H |
| FA-110 | H    | H    | SH   | OH   | H |
| FA-111 | H    | H    | H    | OH   | H |
| FA-112 | H    | COOH | H    | SH   | H |
| FA-113 | H    | NH2  | H    | SH   | H |
| FA-114 | H    | OH   | H    | SH   | H |
| FA-115 | H    | SH   | H    | SH   | H |
| FA-116 | H    | H    | COOH | SH   | H |
| FA-117 | H    | H    | NH2  | SH   | H |
| FA-118 | H    | H    | OH   | SH   | H |
| FA-119 | H    | H    | SH   | SH   | H |
| FA-120 | H    | H    | H    | SH   | H |
| FA-121 | COOH | COOH | H    | H    | H |
| FA-122 | COOH | NH2  | H    | H    | H |
| FA-123 | COOH | OH   | H    | H    | H |
| FA-124 | COOH | SH   | H    | H    | H |
| FA-125 | COOH | H    | COOH | H    | H |

|        |      |      |      |   |   |
|--------|------|------|------|---|---|
| FA-126 | COOH | H    | NH2  | H | H |
| FA-127 | COOH | H    | OH   | H | H |
| FA-128 | COOH | H    | SH   | H | H |
| FA-129 | COOH | H    | H    | H | H |
| FA-130 | NH2  | COOH | H    | H | H |
| FA-131 | NH2  | NH2  | H    | H | H |
| FA-132 | NH2  | OH   | H    | H | H |
| FA-133 | NH2  | SH   | H    | H | H |
| FA-134 | NH2  | H    | COOH | H | H |
| FA-135 | NH2  | H    | NH2  | H | H |
| FA-136 | NH2  | H    | OH   | H | H |
| FA-137 | NH2  | H    | SH   | H | H |
| FA-138 | NH2  | H    | H    | H | H |
| FA-139 | OH   | COOH | H    | H | H |
| FA-140 | OH   | NH2  | H    | H | H |
| FA-141 | OH   | OH   | H    | H | H |
| FA-142 | OH   | SH   | H    | H | H |
| FA-143 | OH   | H    | COOH | H | H |
| FA-144 | OH   | H    | NH2  | H | H |
| FA-145 | OH   | H    | OH   | H | H |
| FA-146 | OH   | H    | SH   | H | H |
| FA-147 | OH   | H    | H    | H | H |
| FA-148 | SH   | COOH | H    | H | H |
| FA-149 | SH   | NH2  | H    | H | H |
| FA-150 | SH   | OH   | H    | H | H |
| FA-151 | SH   | SH   | H    | H | H |
| FA-152 | SH   | H    | COOH | H | H |
| FA-153 | SH   | H    | NH2  | H | H |
| FA-154 | SH   | H    | OH   | H | H |
| FA-155 | SH   | H    | SH   | H | H |
| FA-156 | SH   | H    | H    | H | H |
| FA-157 | H    | COOH | COOH | H | H |
| FA-158 | H    | NH2  | COOH | H | H |
| FA-159 | H    | OH   | COOH | H | H |
| FA-160 | H    | SH   | COOH | H | H |
| FA-161 | H    | COOH | NH2  | H | H |
| FA-162 | H    | NH2  | NH2  | H | H |
| FA-163 | H    | OH   | NH2  | H | H |
| FA-164 | H    | SH   | NH2  | H | H |
| FA-165 | H    | COOH | OH   | H | H |
| FA-166 | H    | NH2  | OH   | H | H |
| FA-167 | H    | OH   | OH   | H | H |
| FA-168 | H    | SH   | OH   | H | H |

---

|        |   |      |      |   |   |
|--------|---|------|------|---|---|
| FA-169 | H | COOH | SH   | H | H |
| FA-170 | H | NH2  | SH   | H | H |
| FA-171 | H | OH   | SH   | H | H |
| FA-172 | H | SH   | SH   | H | H |
| FA-173 | H | COOH | H    | H | H |
| FA-174 | H | NH2  | H    | H | H |
| FA-175 | H | OH   | H    | H | H |
| FA-176 | H | SH   | H    | H | H |
| FA-177 | H | H    | COOH | H | H |
| FA-178 | H | H    | NH2  | H | H |
| FA-179 | H | H    | OH   | H | H |
| FA-180 | H | H    | SH   | H | H |

---

**Table S2.** Values of the ADME properties: water/octanol partition coefficient (logP), topological polar surface area (PSA), number of heavy atoms (<sup>X</sup>At), molecular weight (MW), number of H-bond acceptors (HBA), number of H-bond donors (HBD), rotatable bonds (RB), and molar refractivity (MR); toxicity descriptors: oral rat 50 percent lethal dose (LD<sub>50</sub>); Ames' mutagenicity (M); the synthetic accessibility (SA); and selection score (S<sup>S</sup>).

|       | logP  | PSA    | <sup>X</sup> At | MW     | HB <sup>A</sup> | HB <sup>D</sup> | RB | <sup>M</sup> R | LD <sub>50</sub> | M    | SA   | S <sup>S</sup> |
|-------|-------|--------|-----------------|--------|-----------------|-----------------|----|----------------|------------------|------|------|----------------|
| FA    | 1.25  | 66.76  | 14              | 194.19 | 4               | 2               | 3  | 51.33          | 4742.73          | 0.22 | 2.13 | 3.77           |
| FA-1  | -0.30 | 141.36 | 20              | 282.20 | 8               | 4               | 5  | 64.87          | 1672.76          | 0.52 | 3.72 | 2.99           |
| FA-2  | -0.39 | 130.08 | 18              | 253.21 | 7               | 5               | 4  | 62.32          | 2289.44          | 0.33 | 3.30 | 3.34           |
| FA-3  | -0.10 | 124.29 | 18              | 254.19 | 7               | 4               | 4  | 59.57          | 1181.06          | 0.28 | 3.26 | 3.23           |
| FA-4  | 0.35  | 104.06 | 18              | 270.26 | 6               | 3               | 4  | 65.16          | 1003.90          | 0.16 | 3.32 | 3.31           |
| FA-5  | -0.15 | 130.08 | 18              | 253.21 | 7               | 5               | 4  | 61.42          | 3936.05          | 0.18 | 3.51 | 3.56           |
| FA-6  | -0.24 | 118.81 | 16              | 224.22 | 6               | 6               | 3  | 58.87          | 2458.08          | 0.41 | 3.12 | 3.20           |
| FA-7  | 0.06  | 113.01 | 16              | 225.20 | 6               | 5               | 3  | 56.12          | 1117.37          | 0.18 | 3.09 | 3.34           |
| FA-8  | 0.51  | 92.78  | 16              | 241.27 | 5               | 4               | 3  | 61.71          | 1911.70          | 0.04 | 3.15 | 3.78           |
| FA-9  | 1.21  | 124.29 | 18              | 254.19 | 7               | 4               | 4  | 59.86          | 3182.26          | 0.59 | 3.41 | 3.27           |
| FA-10 | 1.12  | 113.01 | 16              | 225.20 | 6               | 5               | 3  | 57.31          | 1101.01          | 0.14 | 3.01 | 3.40           |
| FA-11 | 1.41  | 107.22 | 16              | 226.18 | 6               | 4               | 3  | 54.57          | 1964.96          | 0.33 | 2.98 | 3.35           |
| FA-12 | 1.86  | 86.99  | 16              | 242.25 | 5               | 3               | 3  | 60.15          | 2424.68          | 0.04 | 3.03 | 3.85           |
| FA-13 | 0.76  | 104.06 | 18              | 270.26 | 6               | 3               | 4  | 66.22          | 1213.44          | 0.29 | 3.51 | 3.20           |
| FA-14 | 0.67  | 92.78  | 16              | 241.27 | 5               | 4               | 3  | 63.67          | 1358.57          | 0.21 | 3.13 | 3.35           |
| FA-15 | 0.97  | 86.99  | 16              | 242.25 | 5               | 3               | 3  | 60.92          | 2485.60          | 0.23 | 3.09 | 3.46           |
| FA-16 | 1.42  | 66.76  | 16              | 258.32 | 4               | 2               | 3  | 66.51          | 2034.75          | 0.28 | 3.15 | 3.37           |
| FA-17 | -0.05 | 141.36 | 20              | 282.20 | 8               | 4               | 5  | 64.87          | 3249.58          | 0.43 | 3.63 | 3.19           |
| FA-18 | -0.14 | 130.08 | 18              | 253.21 | 7               | 5               | 4  | 62.32          | 1928.03          | 0.64 | 3.23 | 3.16           |
| FA-19 | 0.16  | 124.29 | 18              | 254.19 | 7               | 4               | 4  | 59.57          | 2351.06          | 0.27 | 3.15 | 3.41           |
| FA-21 | 0.29  | 130.08 | 18              | 253.21 | 7               | 5               | 4  | 61.42          | 4091.49          | 0.25 | 3.48 | 3.50           |
| FA-22 | 0.20  | 118.81 | 16              | 224.22 | 6               | 6               | 3  | 58.87          | 3023.67          | 0.19 | 3.09 | 3.42           |
| FA-23 | 0.49  | 113.01 | 16              | 225.20 | 6               | 5               | 3  | 56.12          | 2352.39          | 0.25 | 3.06 | 3.44           |



|       |      |        |    |        |   |   |   |       |         |      |      |      |
|-------|------|--------|----|--------|---|---|---|-------|---------|------|------|------|
| FA-24 | 0.94 | 92.78  | 16 | 241.27 | 5 | 4 | 3 | 61.71 | 1979.75 | 0.08 | 3.12 | 3.64 |
| FA-25 | 0.43 | 124.29 | 18 | 254.19 | 7 | 4 | 4 | 59.86 | 3493.74 | 0.36 | 3.48 | 3.39 |
| FA-26 | 0.34 | 113.01 | 16 | 225.20 | 6 | 5 | 3 | 57.31 | 3635.20 | 0.11 | 3.09 | 3.70 |
| FA-27 | 0.64 | 107.22 | 16 | 226.18 | 6 | 4 | 3 | 54.57 | 3011.62 | 0.20 | 3.05 | 3.54 |
| FA-28 | 1.09 | 86.99  | 16 | 242.25 | 5 | 3 | 3 | 60.15 | 1506.13 | 0.07 | 3.12 | 3.61 |
| FA-29 | 0.82 | 104.06 | 18 | 270.26 | 6 | 3 | 4 | 66.22 | 3312.19 | 0.30 | 3.48 | 3.41 |
| FA-30 | 0.73 | 92.78  | 16 | 241.27 | 5 | 4 | 3 | 63.67 | 3573.17 | 0.48 | 3.09 | 3.38 |
| FA-31 | 1.03 | 86.99  | 16 | 242.25 | 5 | 3 | 3 | 60.92 | 1807.44 | 0.56 | 3.06 | 3.20 |
| FA-32 | 1.47 | 66.76  | 16 | 258.32 | 4 | 2 | 3 | 66.51 | 1312.43 | 0.25 | 3.12 | 3.30 |
| FA-33 | 0.27 | 141.36 | 20 | 282.20 | 8 | 4 | 5 | 65.25 | 3646.68 | 0.07 | 3.68 | 3.60 |
| FA-34 | 0.18 | 130.08 | 18 | 253.21 | 7 | 5 | 4 | 62.70 | 3807.34 | 0.19 | 3.42 | 3.55 |
| FA-35 | 0.48 | 124.29 | 18 | 254.19 | 7 | 4 | 4 | 59.95 | 3903.17 | 0.22 | 3.37 | 3.53 |
| FA-36 | 0.92 | 104.06 | 18 | 270.26 | 6 | 3 | 4 | 65.54 | 2349.00 | 0.24 | 3.43 | 3.39 |
| FA-37 | 0.18 | 130.08 | 18 | 253.21 | 7 | 5 | 4 | 62.70 | 3599.69 | 0.35 | 3.42 | 3.41 |
| FA-38 | 0.09 | 118.81 | 16 | 224.22 | 6 | 6 | 3 | 60.15 | 1349.50 | 0.35 | 3.02 | 3.12 |
| FA-39 | 0.39 | 113.01 | 16 | 225.20 | 6 | 5 | 3 | 57.41 | 3193.72 | 0.21 | 3.01 | 3.55 |
| FA-40 | 0.84 | 92.78  | 16 | 241.27 | 5 | 4 | 3 | 62.99 | 2361.13 | 0.14 | 3.04 | 3.57 |
| FA-41 | 0.68 | 124.29 | 18 | 254.19 | 7 | 4 | 4 | 59.95 | 3185.60 | 0.04 | 3.40 | 3.85 |
| FA-42 | 0.59 | 113.01 | 16 | 225.20 | 6 | 5 | 3 | 57.41 | 3124.48 | 0.25 | 3.01 | 3.51 |
| FA-43 | 0.89 | 107.22 | 16 | 226.18 | 6 | 4 | 3 | 54.66 | 2148.21 | 0.16 | 2.99 | 3.52 |
| FA-44 | 1.34 | 86.99  | 16 | 242.25 | 5 | 3 | 3 | 60.25 | 1950.51 | 0.34 | 3.02 | 3.33 |
| FA-46 | 0.84 | 92.78  | 16 | 241.27 | 5 | 4 | 3 | 62.99 | 2671.60 | 0.31 | 3.05 | 3.42 |
| FA-47 | 1.13 | 86.99  | 16 | 242.25 | 5 | 3 | 3 | 60.25 | 1623.64 | 0.41 | 3.03 | 3.25 |
| FA-49 | 0.92 | 141.36 | 20 | 282.20 | 8 | 4 | 5 | 65.25 | 3698.65 | 0.27 | 3.70 | 3.31 |
| FA-50 | 0.83 | 130.08 | 18 | 253.21 | 7 | 5 | 4 | 62.70 | 4869.38 | 0.13 | 3.38 | 3.69 |
| FA-51 | 1.13 | 124.29 | 18 | 254.19 | 7 | 4 | 4 | 59.95 | 3990.69 | 0.35 | 3.36 | 3.44 |
| FA-53 | 0.41 | 130.08 | 18 | 253.21 | 7 | 5 | 4 | 62.70 | 3442.03 | 0.22 | 3.42 | 3.50 |
| FA-54 | 0.32 | 118.81 | 16 | 224.22 | 6 | 6 | 3 | 60.15 | 1620.47 | 0.34 | 3.02 | 3.17 |
| FA-55 | 0.62 | 113.01 | 16 | 225.20 | 6 | 5 | 3 | 57.41 | 2973.63 | 0.26 | 3.01 | 3.49 |

|       |       |        |    |        |   |   |   |       |         |      |      |      |
|-------|-------|--------|----|--------|---|---|---|-------|---------|------|------|------|
| FA-58 | 0.39  | 113.01 | 16 | 225.20 | 6 | 5 | 3 | 57.41 | 2788.03 | 0.31 | 2.96 | 3.44 |
| FA-59 | 0.68  | 107.22 | 16 | 226.18 | 6 | 4 | 3 | 54.66 | 2396.38 | 0.24 | 2.99 | 3.46 |
| FA-62 | 1.06  | 92.78  | 16 | 241.27 | 5 | 4 | 3 | 62.99 | 1542.31 | 0.27 | 3.05 | 3.33 |
| FA-63 | 1.36  | 86.99  | 16 | 242.25 | 5 | 3 | 3 | 60.25 | 1553.81 | 0.46 | 3.03 | 3.22 |
| FA-65 | 0.77  | 104.06 | 17 | 238.20 | 6 | 3 | 4 | 58.29 | 4344.40 | 0.17 | 3.31 | 3.62 |
| FA-66 | 0.68  | 92.78  | 15 | 209.20 | 5 | 4 | 3 | 55.74 | 4961.04 | 0.27 | 2.90 | 3.60 |
| FA-67 | 0.98  | 86.99  | 15 | 210.19 | 5 | 3 | 3 | 52.99 | 4195.81 | 0.27 | 2.83 | 3.58 |
| FA-69 | -0.82 | 141.36 | 20 | 282.20 | 8 | 4 | 5 | 64.49 | 1688.65 | 0.38 | 3.47 | 2.97 |
| FA-70 | -0.67 | 130.08 | 18 | 253.21 | 7 | 5 | 4 | 61.04 | 2959.29 | 0.49 | 3.26 | 3.19 |
| FA-71 | 0.69  | 124.29 | 18 | 254.19 | 7 | 4 | 4 | 59.48 | 1781.70 | 0.41 | 3.13 | 3.26 |
| FA-72 | 0.25  | 104.06 | 18 | 270.26 | 6 | 3 | 4 | 65.84 | 1747.36 | 0.28 | 3.26 | 3.32 |
| FA-73 | -0.48 | 130.08 | 18 | 253.21 | 7 | 5 | 4 | 61.04 | 2226.10 | 0.33 | 3.30 | 3.21 |
| FA-74 | -0.33 | 118.81 | 16 | 224.22 | 6 | 6 | 3 | 57.59 | 3364.27 | 0.19 | 3.16 | 3.43 |
| FA-75 | 1.03  | 113.01 | 16 | 225.20 | 6 | 5 | 3 | 56.03 | 2291.55 | 0.28 | 2.99 | 3.42 |
| FA-76 | 0.58  | 92.78  | 16 | 241.27 | 5 | 4 | 3 | 62.39 | 1506.03 | 0.36 | 3.17 | 3.24 |
| FA-77 | -0.34 | 124.29 | 18 | 254.19 | 7 | 4 | 4 | 59.48 | 1566.95 | 0.39 | 3.28 | 3.22 |
| FA-78 | -0.18 | 113.01 | 16 | 225.20 | 6 | 5 | 3 | 56.03 | 1579.79 | 0.26 | 3.13 | 3.33 |
| FA-79 | 1.17  | 107.22 | 16 | 226.18 | 6 | 4 | 3 | 54.47 | 2073.78 | 0.36 | 2.98 | 3.34 |
| FA-80 | 0.73  | 86.99  | 16 | 242.25 | 5 | 3 | 3 | 60.83 | 1802.60 | 0.15 | 3.13 | 3.48 |
| FA-81 | 0.05  | 104.06 | 18 | 270.26 | 6 | 3 | 4 | 65.84 | 1641.82 | 0.27 | 3.30 | 3.31 |
| FA-82 | 0.20  | 92.78  | 16 | 241.27 | 5 | 4 | 3 | 62.39 | 2934.47 | 0.12 | 3.17 | 3.63 |
| FA-83 | 1.56  | 86.99  | 16 | 242.25 | 5 | 3 | 3 | 60.83 | 5133.66 | 0.33 | 3.00 | 3.55 |
| FA-84 | 1.11  | 66.76  | 16 | 258.32 | 4 | 2 | 3 | 67.19 | 1258.31 | 0.15 | 3.16 | 3.40 |
| FA-85 | -0.50 | 141.36 | 20 | 282.20 | 8 | 4 | 5 | 64.87 | 1309.65 | 0.39 | 3.63 | 2.89 |
| FA-86 | -0.59 | 130.08 | 18 | 253.21 | 7 | 5 | 4 | 62.32 | 2489.84 | 0.33 | 3.24 | 3.24 |
| FA-87 | -0.09 | 124.29 | 18 | 254.19 | 7 | 4 | 4 | 59.57 | 1218.06 | 0.28 | 3.22 | 3.25 |
| FA-88 | 0.16  | 104.06 | 18 | 270.26 | 6 | 3 | 4 | 65.16 | 510.09  | 0.01 | 3.28 | 3.77 |
| FA-89 | 0.15  | 141.36 | 20 | 282.20 | 8 | 4 | 5 | 64.87 | 2452.13 | 0.41 | 3.57 | 3.15 |
| FA-90 | -0.36 | 130.08 | 18 | 253.21 | 7 | 5 | 4 | 62.32 | 2090.73 | 0.33 | 3.22 | 3.33 |

|        |       |        |    |        |   |   |   |       |         |      |      |      |
|--------|-------|--------|----|--------|---|---|---|-------|---------|------|------|------|
| FA-91  | -0.29 | 124.29 | 18 | 254.19 | 7 | 4 | 4 | 59.57 | 1694.60 | 0.54 | 3.16 | 3.18 |
| FA-92  | 0.39  | 104.06 | 18 | 270.26 | 6 | 3 | 4 | 65.16 | 1232.70 | 0.10 | 3.24 | 3.47 |
| FA-93  | 0.00  | 104.06 | 17 | 238.20 | 6 | 3 | 4 | 57.91 | 1988.85 | 0.19 | 3.10 | 3.45 |
| FA-94  | -0.35 | 130.08 | 18 | 253.21 | 7 | 5 | 4 | 61.42 | 1778.62 | 0.49 | 3.42 | 3.18 |
| FA-95  | -0.44 | 118.81 | 16 | 224.22 | 6 | 6 | 3 | 58.87 | 2377.73 | 0.77 | 3.05 | 2.94 |
| FA-96  | 0.07  | 113.01 | 16 | 225.20 | 6 | 5 | 3 | 56.12 | 1340.74 | 0.23 | 3.04 | 3.33 |
| FA-98  | 0.30  | 130.08 | 18 | 253.21 | 7 | 5 | 4 | 61.42 | 2462.27 | 0.21 | 3.40 | 3.44 |
| FA-99  | -0.21 | 118.81 | 16 | 224.22 | 6 | 6 | 3 | 58.87 | 2551.25 | 0.36 | 3.05 | 3.25 |
| FA-100 | -0.14 | 113.01 | 16 | 225.20 | 6 | 5 | 3 | 56.12 | 1229.27 | 0.39 | 3.00 | 3.21 |
| FA-101 | 0.54  | 92.78  | 16 | 241.27 | 5 | 4 | 3 | 61.71 | 558.39  | 0.45 | 3.07 | 2.99 |
| FA-102 | 0.15  | 92.78  | 15 | 209.20 | 5 | 4 | 3 | 54.46 | 3063.91 | 0.20 | 2.94 | 3.56 |
| FA-103 | 1.01  | 124.29 | 18 | 254.19 | 7 | 4 | 4 | 59.86 | 2566.85 | 0.46 | 3.34 | 3.28 |
| FA-104 | 0.92  | 113.01 | 16 | 225.20 | 6 | 5 | 3 | 57.31 | 2624.82 | 0.27 | 2.97 | 3.46 |
| FA-105 | 1.42  | 107.22 | 16 | 226.18 | 6 | 4 | 3 | 54.57 | 1630.44 | 0.36 | 2.96 | 3.29 |
| FA-106 | 1.66  | 86.99  | 16 | 242.25 | 5 | 3 | 3 | 60.15 | 1014.35 | 0.01 | 2.99 | 3.96 |
| FA-107 | 1.66  | 124.29 | 18 | 254.19 | 7 | 4 | 4 | 59.86 | 3704.29 | 0.22 | 3.29 | 3.53 |
| FA-108 | 1.15  | 113.01 | 16 | 225.20 | 6 | 5 | 3 | 57.31 | 2381.79 | 0.10 | 2.94 | 3.66 |
| FA-109 | 1.22  | 107.22 | 16 | 226.18 | 6 | 4 | 3 | 54.57 | 1587.16 | 0.23 | 2.89 | 3.39 |
| FA-110 | 1.89  | 86.99  | 16 | 242.25 | 5 | 3 | 3 | 60.15 | 1292.67 | 0.11 | 2.95 | 3.50 |
| FA-111 | 1.51  | 86.99  | 15 | 210.19 | 5 | 3 | 3 | 52.90 | 2167.98 | 0.15 | 2.79 | 3.57 |
| FA-112 | 0.56  | 104.06 | 18 | 270.26 | 6 | 3 | 4 | 66.22 | 508.88  | 0.28 | 3.42 | 3.03 |
| FA-113 | 0.47  | 92.78  | 16 | 241.27 | 5 | 4 | 3 | 63.67 | 988.86  | 0.36 | 3.06 | 3.17 |
| FA-114 | 0.98  | 86.99  | 16 | 242.25 | 5 | 3 | 3 | 60.92 | 3122.98 | 0.27 | 3.04 | 3.48 |
| FA-115 | 1.22  | 66.76  | 16 | 258.32 | 4 | 2 | 3 | 66.51 | 1461.59 | 0.01 | 3.10 | 4.03 |
| FA-116 | 1.21  | 104.06 | 18 | 270.26 | 6 | 3 | 4 | 66.22 | 4240.07 | 0.26 | 3.40 | 3.51 |
| FA-117 | 0.70  | 92.78  | 16 | 241.27 | 5 | 4 | 3 | 63.67 | 1996.09 | 0.19 | 3.05 | 3.46 |
| FA-118 | 0.77  | 86.99  | 16 | 242.25 | 5 | 3 | 3 | 60.92 | 2113.27 | 0.06 | 3.00 | 3.73 |
| FA-119 | 1.45  | 66.76  | 16 | 258.32 | 4 | 2 | 3 | 66.51 | 1550.35 | 0.17 | 3.07 | 3.43 |
| FA-120 | 1.06  | 66.76  | 15 | 226.25 | 4 | 2 | 3 | 59.26 | 3912.04 | 0.20 | 2.94 | 3.61 |

|        |       |        |    |        |   |   |   |       |         |      |      |      |
|--------|-------|--------|----|--------|---|---|---|-------|---------|------|------|------|
| FA-121 | -0.25 | 141.36 | 20 | 282.20 | 8 | 4 | 5 | 64.87 | 2228.35 | 0.49 | 3.56 | 3.09 |
| FA-122 | -0.34 | 130.08 | 18 | 253.21 | 7 | 5 | 4 | 62.32 | 1655.03 | 0.52 | 3.18 | 3.18 |
| FA-123 | 0.17  | 124.29 | 18 | 254.19 | 7 | 4 | 4 | 59.57 | 1872.80 | 0.28 | 3.09 | 3.36 |
| FA-125 | 0.58  | 141.36 | 20 | 282.20 | 8 | 4 | 5 | 64.87 | 3916.41 | 0.36 | 3.52 | 3.28 |
| FA-126 | 0.07  | 130.08 | 18 | 253.21 | 7 | 5 | 4 | 62.32 | 1813.57 | 0.47 | 3.16 | 3.23 |
| FA-127 | 0.14  | 124.29 | 18 | 254.19 | 7 | 4 | 4 | 59.57 | 3017.85 | 0.29 | 3.11 | 3.45 |
| FA-129 | 0.43  | 104.06 | 17 | 238.20 | 6 | 3 | 4 | 57.91 | 2030.14 | 0.13 | 2.98 | 3.56 |
| FA-130 | 0.09  | 130.08 | 18 | 253.21 | 7 | 5 | 4 | 61.42 | 3957.12 | 0.28 | 3.40 | 3.48 |
| FA-131 | 0.00  | 118.81 | 16 | 224.22 | 6 | 6 | 3 | 58.87 | 2643.05 | 0.26 | 3.04 | 3.33 |
| FA-132 | 0.50  | 113.01 | 16 | 225.20 | 6 | 5 | 3 | 56.12 | 2740.56 | 0.23 | 3.03 | 3.49 |
| FA-134 | 0.92  | 130.08 | 18 | 253.21 | 7 | 5 | 4 | 61.42 | 4520.59 | 0.32 | 3.37 | 3.48 |
| FA-135 | 0.41  | 118.81 | 16 | 224.22 | 6 | 6 | 3 | 58.87 | 3348.67 | 0.21 | 3.01 | 3.43 |
| FA-136 | 0.48  | 113.01 | 16 | 225.20 | 6 | 5 | 3 | 56.12 | 4228.28 | 0.21 | 2.86 | 3.63 |
| FA-137 | 1.15  | 92.78  | 16 | 241.27 | 5 | 4 | 3 | 61.71 | 2165.76 | 0.18 | 3.04 | 3.49 |
| FA-138 | 0.77  | 92.78  | 15 | 209.20 | 5 | 4 | 3 | 54.46 | 3022.97 | 0.05 | 2.74 | 3.89 |
| FA-139 | 0.24  | 124.29 | 18 | 254.19 | 7 | 4 | 4 | 59.86 | 3721.68 | 0.28 | 3.40 | 3.47 |
| FA-140 | 0.15  | 113.01 | 16 | 225.20 | 6 | 5 | 3 | 57.31 | 2574.85 | 0.24 | 3.04 | 3.47 |
| FA-141 | 0.65  | 107.22 | 16 | 226.18 | 6 | 4 | 3 | 54.57 | 2163.28 | 0.17 | 3.02 | 3.51 |
| FA-142 | 0.89  | 86.99  | 16 | 242.25 | 5 | 3 | 3 | 60.15 | 1780.92 | 0.01 | 3.08 | 4.07 |
| FA-143 | 1.06  | 124.29 | 18 | 254.19 | 7 | 4 | 4 | 59.86 | 4175.83 | 0.28 | 3.37 | 3.49 |
| FA-144 | 0.56  | 113.01 | 16 | 225.20 | 6 | 5 | 3 | 57.31 | 2283.22 | 0.30 | 3.01 | 3.40 |
| FA-145 | 0.62  | 107.22 | 16 | 226.18 | 6 | 4 | 3 | 54.57 | 3310.89 | 0.19 | 2.96 | 3.58 |
| FA-147 | 0.92  | 86.99  | 15 | 210.19 | 5 | 3 | 3 | 52.90 | 6133.62 | 0.37 | 2.86 | 3.59 |
| FA-148 | 0.62  | 104.06 | 18 | 270.26 | 6 | 3 | 4 | 66.22 | 3014.87 | 0.34 | 3.40 | 3.38 |
| FA-149 | 0.53  | 92.78  | 16 | 241.27 | 5 | 4 | 3 | 63.67 | 4122.82 | 0.39 | 3.04 | 3.46 |
| FA-150 | 1.04  | 86.99  | 16 | 242.25 | 5 | 3 | 3 | 60.92 | 2156.74 | 0.39 | 3.03 | 3.33 |
| FA-151 | 1.28  | 66.76  | 16 | 258.32 | 4 | 2 | 3 | 66.51 | 662.14  | 0.06 | 3.08 | 3.47 |
| FA-152 | 1.45  | 104.06 | 18 | 270.26 | 6 | 3 | 4 | 66.22 | 2630.16 | 0.21 | 3.37 | 3.46 |
| FA-153 | 0.94  | 92.78  | 16 | 241.27 | 5 | 4 | 3 | 63.67 | 1610.40 | 0.33 | 3.02 | 3.30 |

|        |      |        |    |        |   |   |   |       |         |      |      |      |
|--------|------|--------|----|--------|---|---|---|-------|---------|------|------|------|
| FA-154 | 1.01 | 86.99  | 16 | 242.25 | 5 | 3 | 3 | 60.92 | 1902.78 | 0.31 | 2.97 | 3.36 |
| FA-155 | 1.69 | 66.76  | 16 | 258.32 | 4 | 2 | 3 | 66.51 | 887.05  | 0.04 | 3.04 | 3.63 |
| FA-156 | 1.30 | 66.76  | 15 | 226.25 | 4 | 2 | 3 | 59.26 | 1492.20 | 0.12 | 2.86 | 3.53 |
| FA-157 | 0.30 | 141.36 | 20 | 282.20 | 8 | 4 | 5 | 65.25 | 3254.06 | 0.24 | 3.69 | 3.31 |
| FA-158 | 0.21 | 130.08 | 18 | 253.21 | 7 | 5 | 4 | 62.70 | 3835.71 | 0.28 | 3.38 | 3.47 |
| FA-159 | 0.51 | 124.29 | 18 | 254.19 | 7 | 4 | 4 | 59.95 | 3404.81 | 0.29 | 3.36 | 3.44 |
| FA-161 | 0.21 | 130.08 | 18 | 253.21 | 7 | 5 | 4 | 62.70 | 3591.72 | 0.22 | 3.42 | 3.51 |
| FA-162 | 0.12 | 118.81 | 16 | 224.22 | 6 | 6 | 3 | 60.15 | 1787.02 | 0.49 | 3.02 | 3.11 |
| FA-163 | 0.42 | 113.01 | 16 | 225.20 | 6 | 5 | 3 | 57.41 | 3262.29 | 0.25 | 3.01 | 3.51 |
| FA-165 | 0.51 | 124.29 | 18 | 254.19 | 7 | 4 | 4 | 59.95 | 4618.86 | 0.23 | 3.37 | 3.56 |
| FA-166 | 0.42 | 113.01 | 16 | 225.20 | 6 | 5 | 3 | 57.41 | 2936.62 | 0.13 | 2.96 | 3.64 |
| FA-167 | 0.72 | 107.22 | 16 | 226.18 | 6 | 4 | 3 | 54.66 | 2543.00 | 0.31 | 3.00 | 3.42 |
| FA-169 | 0.96 | 104.06 | 18 | 270.26 | 6 | 3 | 4 | 65.54 | 1911.54 | 0.30 | 3.43 | 3.30 |
| FA-170 | 0.87 | 92.78  | 16 | 241.27 | 5 | 4 | 3 | 62.99 | 4026.98 | 0.28 | 3.04 | 3.53 |
| FA-171 | 1.16 | 86.99  | 16 | 242.25 | 5 | 3 | 3 | 60.25 | 1726.80 | 0.63 | 3.02 | 3.17 |
| FA-173 | 0.57 | 104.06 | 17 | 238.20 | 6 | 3 | 4 | 58.29 | 4471.90 | 0.13 | 3.22 | 3.70 |
| FA-174 | 0.48 | 92.78  | 15 | 209.20 | 5 | 4 | 3 | 55.74 | 3391.37 | 0.44 | 2.78 | 3.43 |
| FA-175 | 0.99 | 86.99  | 15 | 210.19 | 5 | 3 | 3 | 52.99 | 4040.74 | 0.03 | 2.76 | 4.06 |
| FA-177 | 1.40 | 104.06 | 17 | 238.20 | 6 | 3 | 4 | 58.29 | 3837.04 | 0.14 | 3.18 | 3.65 |
| FA-178 | 0.89 | 92.78  | 15 | 209.20 | 5 | 4 | 3 | 55.74 | 4841.39 | 0.36 | 2.80 | 3.55 |
| FA-179 | 0.96 | 86.99  | 15 | 210.19 | 5 | 3 | 3 | 52.99 | 4863.77 | 0.21 | 2.70 | 3.69 |
| FA-181 | 0.83 | 107.22 | 17 | 258.25 | 6 | 4 | 3 | 61.82 | 1454.07 | 0.29 | 3.22 | 3.28 |
| FA-182 | 0.72 | 107.22 | 16 | 226.18 | 6 | 4 | 3 | 54.66 | 2543.00 | 0.31 | 3.00 | 3.42 |
| FA-184 | 1.60 | 107.22 | 17 | 258.25 | 6 | 4 | 3 | 61.82 | 1675.77 | 0.11 | 3.15 | 3.53 |
| FA-185 | 0.48 | 113.01 | 16 | 225.20 | 6 | 5 | 3 | 56.12 | 4228.28 | 0.21 | 2.86 | 3.63 |

**Table S3.** Elimination scores for the subset of ferulic acid derivatives chosen as the most promising, according to  $S^S$ .

|         | $S^{E,ADME2}$ | $S^{E,ADME8}$ | $S^{E,ADMET}$ | $S^{E,ADMETSA}$ |
|---------|---------------|---------------|---------------|-----------------|
| FA      | 1.33          | 4.12          | 9.28          | 11.13           |
| FA-8    | 1.18          | 5.30          | 7.67          | 8.59            |
| FA-12   | 0.56          | 4.01          | 6.99          | 8.03            |
| FA-26   | 1.42          | 7.34          | 11.54         | 12.52           |
| FA-41   | 0.97          | 6.21          | 10.11         | 10.80           |
| FA-88   | 1.04          | 4.48          | 6.35          | 7.16            |
| FA-106  | 0.65          | 4.09          | 5.50          | 6.56            |
| FA-115  | 0.68          | 2.59          | 4.53          | 5.50            |
| FA-118  | 1.05          | 4.50          | 7.04          | 8.11            |
| FA-138  | 1.40          | 5.95          | 9.62          | 10.92           |
| FA-142  | 1.00          | 4.44          | 6.76          | 7.74            |
| FA-173  | 1.18          | 5.06          | 10.20         | 11.06           |
| FA-175  | 1.29          | 5.17          | 10.12         | 11.40           |
| Average | 1.06          | 4.86          | 8.13          | 9.19            |

**Table S4.** Reference set of molecules, with some neuroprotective effects.

| Compound<br>(CAS)              | Structure | Compound<br>(CAS)             | Structure |
|--------------------------------|-----------|-------------------------------|-----------|
| Acetylcarnitine<br>(3040-38-8) |           | Masitinib<br>(790299-79-5)    |           |
| Amantadine<br>(768-94-5)       |           | Melatonin<br>(73-31-4)        |           |
| Apomorphine<br>(58-00-4)       |           | Memantine<br>(19982-08-2)     |           |
| Baclofen<br>(1134-47-0)        |           | Modafinil<br>(68693-11-8)     |           |
| Benserazide<br>(14919-77-8)    |           | Piribedil<br>(3605-01-4)      |           |
| Benztropine<br>(86-13-5)       |           | Pramipexole<br>(104632-26-0)  |           |
| Biperiden<br>(514-65-8)        |           | Procyclidine<br>(77-37-2)     |           |
| Bromocriptine<br>(25614-03-3)  |           | Remacemide<br>(128298-28-2)   |           |
| Cabergoline<br>(81409-90-7)    |           | Riluzole<br>(1744-22-5)       |           |
| Carbidopa<br>(28860-95-9)      |           | Rivastigmine<br>(123441-03-2) |           |

|                             |                                                                                     |                               |                                                                                       |
|-----------------------------|-------------------------------------------------------------------------------------|-------------------------------|---------------------------------------------------------------------------------------|
| Curcumin<br>(458-37-7)      | 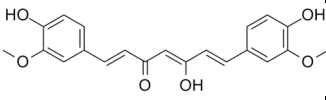   | Ropinirole<br>(91374-21-9)    |    |
| Dantrolene<br>(7261-97-4)   |    | Selegiline<br>(14611-51-9)    |    |
| Donepezil<br>(120014-06-4)  |    | Tacrine<br>(321-64-2)         |    |
| Entacapone<br>(130929-57-6) |    | Tetrabenazine<br>(58-46-8)    |    |
| Galantamine<br>(357-70-0)   |    | Tizanidine<br>(51322-75-9)    |    |
| Ladostigil<br>(209349-27-4) |   | Tolcapone<br>(134308-13-7)    |   |
| L-DOPA<br>(59-92-7)         |  | Trihexyphenidyl<br>(144-11-6) |  |
| Lisuride<br>(18016-80-3)    |  |                               |                                                                                       |



**Table S5.** Pole strength (PS) values for the EPT approximation (P3) used to calculated ionization energies and electron affinities.

|              | PS (IE) | PS (EA) |
|--------------|---------|---------|
| <b>q= +1</b> |         |         |
| FA-138       | 0.875   | 0.953   |
| <b>q= 0</b>  |         |         |
| FA           | 0.879   | 0.913   |
| FA-8         | 0.881   | 0.968   |
| FA-26        | 0.879   | 0.970   |
| FA-118       | 0.879   | 0.976   |
| FA-138       | 0.877   | 0.968   |
| FA-175       | 0.879   | 0.906   |
| <b>q= -1</b> |         |         |
| FA           | 0.881   | 0.973   |
| FA-8         | 0.880   | 0.978   |
| FA-26        | 0.883   | 0.980   |
| FA-118       | 0.886   | 0.981   |
| FA-138       | 0.883   | 0.982   |
| FA-175       | 0.881   | 0.979   |
| <b>q= -2</b> |         |         |
| FA           | 0.876   | 0.983   |
| FA-8         | 0.886   | 0.980   |
| FA-26        | 0.877   | 0.983   |
| FA-118       | 0.889   | 0.983   |
| FA-138       | 0.878   | 0.984   |
| FA-175       | 0.872   | 0.982   |
| <b>q= -3</b> |         |         |
| FA-118       | 0.875   | 0.985   |

**Table S6.** Equations concerning  $S^S$  construction.

$$S^S = S^{ADME} + S^T + S^{SA}$$

where

$$S^{ADME} = \frac{S^{logP} + S^{HB^D} + S^{HB^A} + S^{MW} + S^{^MR} + S^{^XA} + S^{RB} + S^{PSA}}{8}$$

$$S^T = \frac{S^{LD_{50}} + S^M}{2}$$

with

$$S^{logP} = \begin{cases} 1, & \text{if } -0.4 \leq logP \leq 5.0 \\ 0, & \text{otherwise} \end{cases}$$

$$S^{HB^D} = \begin{cases} 1, & \text{if } HB^D \leq 5 \\ 0, & \text{otherwise} \end{cases}$$

$$S^{HB^A} = \begin{cases} 1, & \text{if } HB^A \leq 10 \\ 0, & \text{otherwise} \end{cases}$$

$$S^{MW} = \begin{cases} 1, & \text{if } 160 \leq MW \leq 480 \\ 0, & \text{otherwise} \end{cases}$$

$$S^{^MR} = \begin{cases} 1, & \text{if } 40 \leq ^MR \leq 130 \\ 0, & \text{otherwise} \end{cases}$$

$$S^{^XA} = \begin{cases} 1, & \text{if } ^XA \leq 70 \\ 0, & \text{otherwise} \end{cases}$$

$$S^{RB} = \begin{cases} 1, & \text{if } RB \leq 10 \\ 0, & \text{otherwise} \end{cases}$$

$$S^{PSA} = \begin{cases} 1, & \text{if } PSA \leq 140 \\ 0, & \text{otherwise} \end{cases}$$

$$S^{LD_{50}} = 1 + \log \left( \frac{LD_{50}^{dM}}{LD_{50}^{RefSet}} \right)$$

$$S^M = 1 + \log \left( \frac{M^{RefSet}}{M^{dM}} \right)$$

$$S^{SA} = 1 + \log \left( \frac{SA^{RefSet}}{SA^{dM}} \right)$$

**Table S7.** Exclusion scores ( $S^E$ ) equations.

|                                                                                                                                                                                                                                                                                                                                                                                                                                                                            |
|----------------------------------------------------------------------------------------------------------------------------------------------------------------------------------------------------------------------------------------------------------------------------------------------------------------------------------------------------------------------------------------------------------------------------------------------------------------------------|
| $S^{E,ADME2} = \left  \frac{\log P_{\overline{RefSet}} - \log P_{dM}}{SD_{\log P}} \right  + \left  \frac{MW_{\overline{RefSet}} - MW_{dM}}{SD_{MW}} \right $                                                                                                                                                                                                                                                                                                              |
| $S^{E,ADME8} = S^{E,ADME2} + \left  \frac{PSA_{\overline{RefSet}} - PSA_{dM}}{SD_{PSA}} \right  + \left  \frac{{}^XA_{\overline{RefSet}} - {}^XA_{dM}}{SD_{{}^XA}} \right  + \left  \frac{HB^A_{\overline{RefSet}} - HB^A_{dM}}{SD_{HB^A}} \right $ $+ \left  \frac{HB^D_{\overline{RefSet}} - HB^D_{dM}}{SD_{HB^D}} \right  + \left  \frac{RB_{\overline{RefSet}} - RB_{dM}}{SD_{RB}} \right  + \left  \frac{{}^MR_{\overline{RefSet}} - {}^MR_{dM}}{SD_{{}^MR}} \right $ |
| $S^{E,ADMET} = S^{E,ADME8} + \left  \frac{LD_{50\overline{RefSet}} - LD_{50dM}}{SD_{LD_{50}}} \right  + \left  \frac{M_{\overline{RefSet}} - M_{dM}}{SD_M} \right $                                                                                                                                                                                                                                                                                                        |
| $S^{E,ADMETSA} = S^{E,ADMET} + \left  \frac{SA_{\overline{RefSet}} - SA_{dM}}{SD_{SA}} \right $                                                                                                                                                                                                                                                                                                                                                                            |

**Table S8.** Zero-point bond dissociation energies (BDE, in kcal/mol) for ferulic acid and its derivatives. Only the species with molar fractions  $\geq 10^{-4}$  are included.

| FA           | q=+1   | q=0   | q=-1   | q=-2  | q=-3  |
|--------------|--------|-------|--------|-------|-------|
| Site a       | ---    | 98.09 | 97.94  | 96.96 | ---   |
| Site b       | ---    | 85.15 | 82.48  | ---   | ---   |
| FA-8         | q=+1   | q=0   | q=-1   | q=-2  | q=-3  |
| Site a       | ---    | 98.45 | 189.16 | 97.23 | ---   |
| Site b       | ---    | 88.78 | 87.79  | 82.04 | ---   |
| Site R5 (SH) | ---    | 80.24 | 77.44  | ---   | ---   |
| FA-26        | q=+1   | q=0   | q=-1   | q=-2  | q=-3  |
| Site a       | ---    | 98.93 | 97.79  | 96.98 | ---   |
| Site b       | ---    | 85.12 | 81.89  | 71.30 | ---   |
| Site R1 (OH) | ---    | 83.06 | 77.29  | ---   | ---   |
| FA-118       | q=+1   | q=0   | q=-1   | q=-2  | q=-3  |
| Site a       | ---    | 99.15 | 99.34  | 98.93 | 97.20 |
| Site b       | ---    | 80.18 | 78.79  | 74.87 | 71.01 |
| Site R3 (OH) | ---    | 85.29 | 84.35  | 75.99 | ---   |
| Site R4 (SH) | ---    | 80.33 | 79.56  | ---   | ---   |
| FA-138       | q=+1   | q=0   | q=-1   | q=-2  | q=-3  |
| Site a       | 100.02 | 98.90 | 98.62  | 97.02 | ---   |
| Site b       | 89.30  | 83.97 | 74.88  | ---   | ---   |
| FA-175       | q=+1   | q=0   | q=-1   | q=-2  | q=-3  |
| Site a       | ---    | 97.56 | 97.49  | 97.55 | ---   |
| Site b       | ---    | 80.82 | 78.54  | 75.90 | ---   |
| Site R2 (OH) | ---    | 80.09 | 78.60  | ---   | ---   |

**Table S9.** Binding energies ( $\Delta G_B$ , kcal/mol) for acid-base species of ferulic acid and its derivatives.

| Compound     | q= +1 | q= 0  | q= -1 | q= -2 | q= -3 |
|--------------|-------|-------|-------|-------|-------|
| COMT         |       |       |       |       |       |
| Ferulic acid | ---   | -5.49 | -5.28 | -5.31 | ---   |
| FA-8         | ---   | -5.03 | -5.14 | -4.93 | ---   |
| FA-26        | ---   | -4.98 | -5.09 | -4.8  | ---   |
| FA-118       | ---   | -5.46 | -5.88 | -6.09 | -5.71 |
| FA-138       | -5.25 | -5.1  | -5.14 | -5.2  | ---   |
| FA-175       | ---   | -5.35 | -5.42 | -5.49 | ---   |
| MAO-B        |       |       |       |       |       |
| Ferulic acid | ---   | -7.32 | -7.19 | -6.98 | ---   |
| FA-8         | ---   | -6.88 | -6.91 | -6.75 | ---   |
| FA-26        | ---   | -7.37 | -7.63 | -7.31 | ---   |
| FA-118       | ---   | -6.35 | -7.08 | -7.24 | -6.62 |
| FA-138       | -6.96 | -7.02 | -7.4  | -7.1  | ---   |
| FA-175       | ---   | -6.96 | -7.02 | -6.92 | ---   |
| AChE         |       |       |       |       |       |
| Ferulic acid | ---   | -7.25 | -7.37 | -7.51 | ---   |
| FA-8         | ---   | -6.45 | -6.43 | -6.42 | ---   |
| FA-26        | ---   | -7.93 | -7.88 | -8.08 | ---   |
| FA-118       | ---   | -6.82 | -6.95 | -6.94 | -7.09 |
| FA-138       | -7.36 | -7.39 | -7.41 | -7.67 | ---   |
| FA-175       | ---   | -6.81 | -7.01 | -7.02 | ---   |

**Table S10.** Complete set of weighted binding energies ( $\Delta G^w_B$ , kcal/mol) for FA and its derivatives.

| Compound     | $\Delta G^w_B$ (Kcal/mol) |       |       | S <sub>P</sub> |
|--------------|---------------------------|-------|-------|----------------|
|              | COMT                      | MAO   | AChE  |                |
| Ferulic acid | -5.28                     | -7.19 | -7.37 | 3.78           |
| FA-8         | -5.14                     | -6.91 | -6.43 | 3.50           |
| FA-12        | -4.97                     | -7.33 | -4.38 | 3.09           |
| FA-26        | -5.09                     | -7.63 | -7.88 | 3.93           |
| FA-41        | -5.23                     | -5.61 | -6.59 | 3.34           |
| FA-88        | -4.84                     | -6.91 | -3.79 | 2.87           |
| FA-106       | -5.25                     | -6.86 | -4.44 | 3.08           |
| FA-115       | -4.67                     | -6.59 | -4.30 | 2.90           |
| FA-118       | -5.90                     | -7.09 | -6.95 | 3.79           |
| FA-138       | -5.12                     | -7.17 | -7.40 | 3.76           |
| FA-142       | -5.31                     | -5.47 | -5.83 | 3.17           |
| FA-173       | -5.23                     | -6.94 | -7.35 | 3.73           |
| FA-175       | -5.42                     | -7.02 | -7.01 | 3.70           |

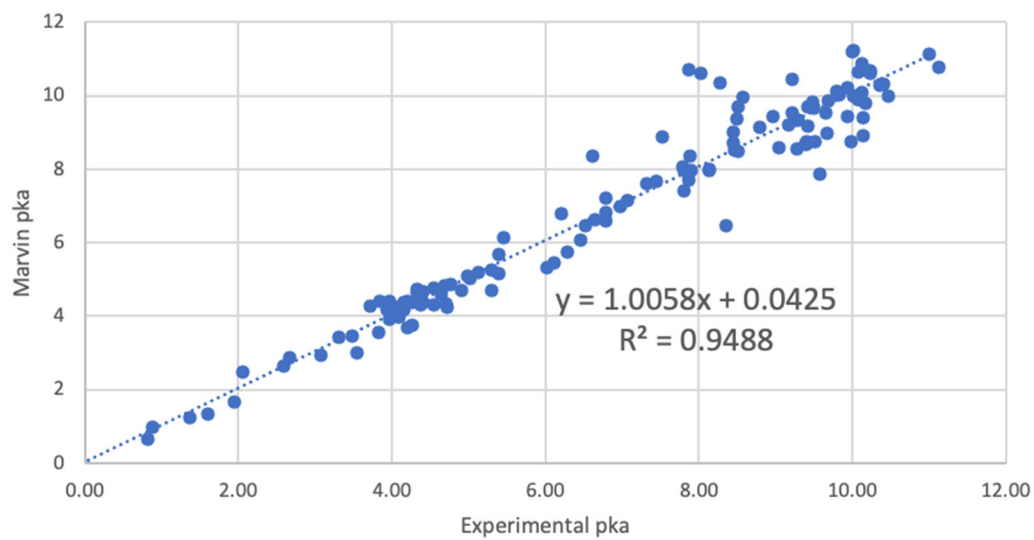

**Figure S1.** Correlation between pKa values estimated with Marvin software vs experimentally pKa values.

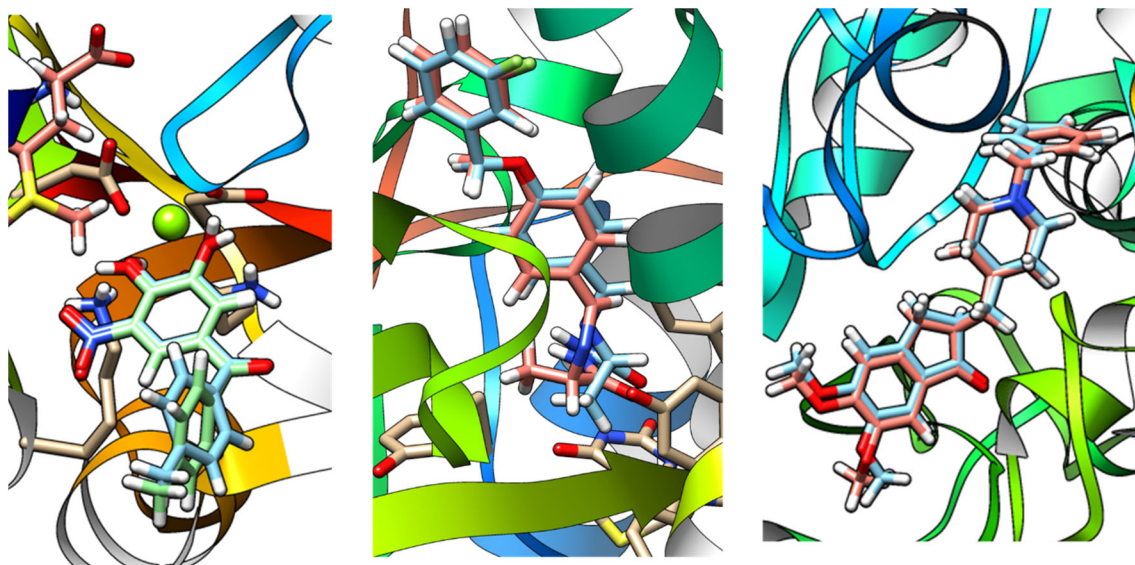

**Figure S2.** Redocking simulations of tolcapone in comt (left), Safrinamide in MAO-B (center) and Donepezil in AChE (right).



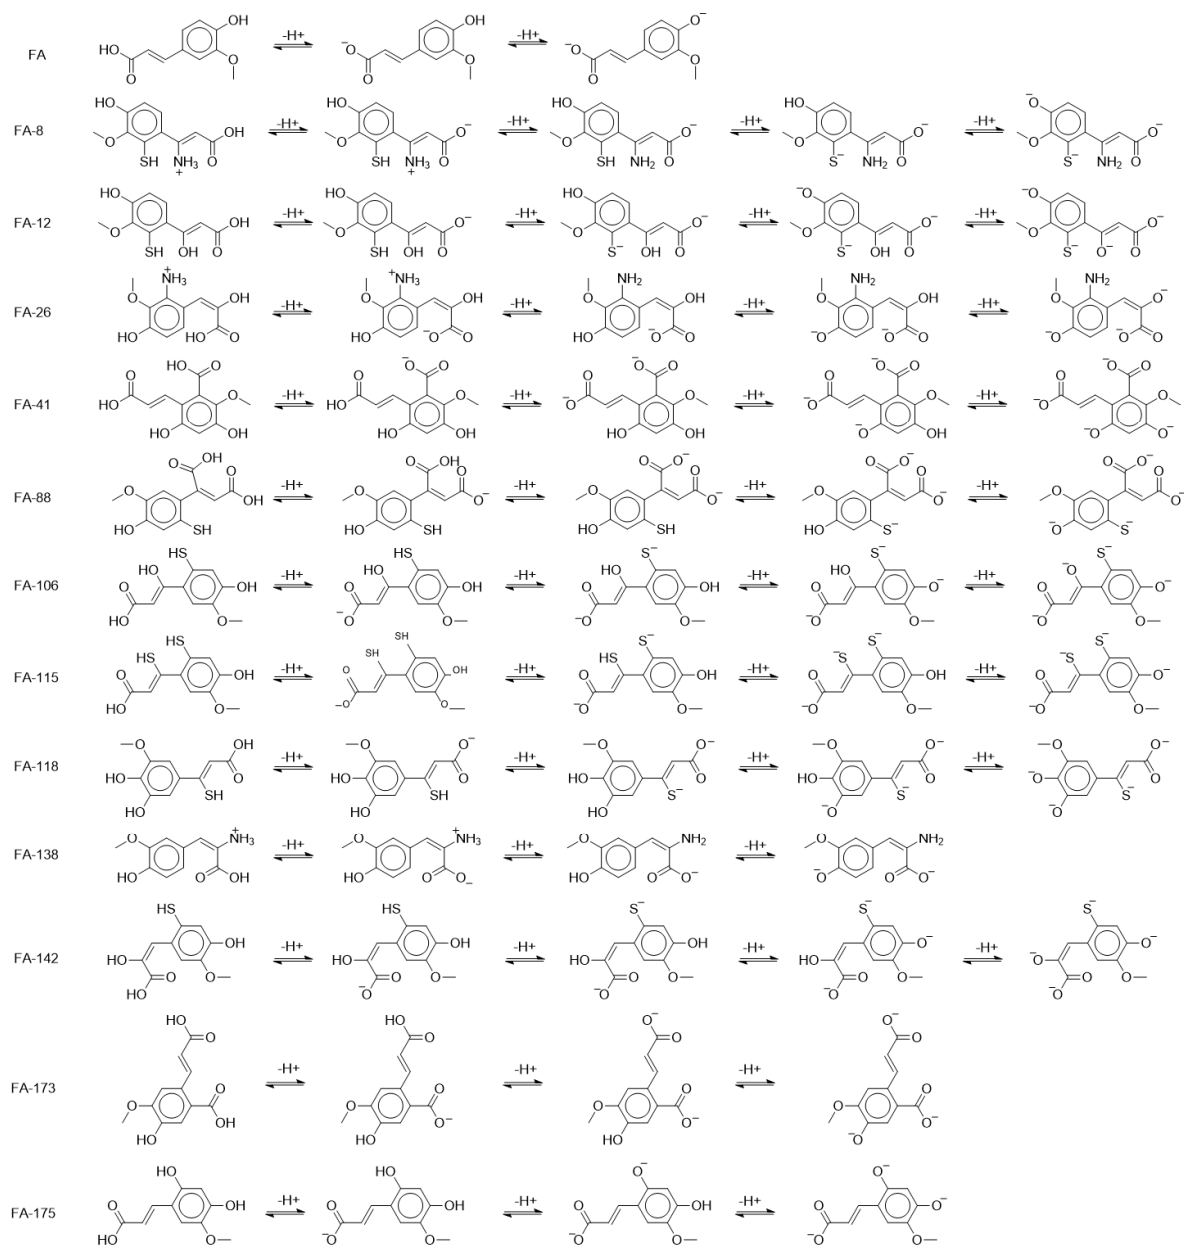

**Figure S3.** Deprotonation routes for the subset of ferulic acid derivatives chosen as the most promising, from their drug-like behavior.

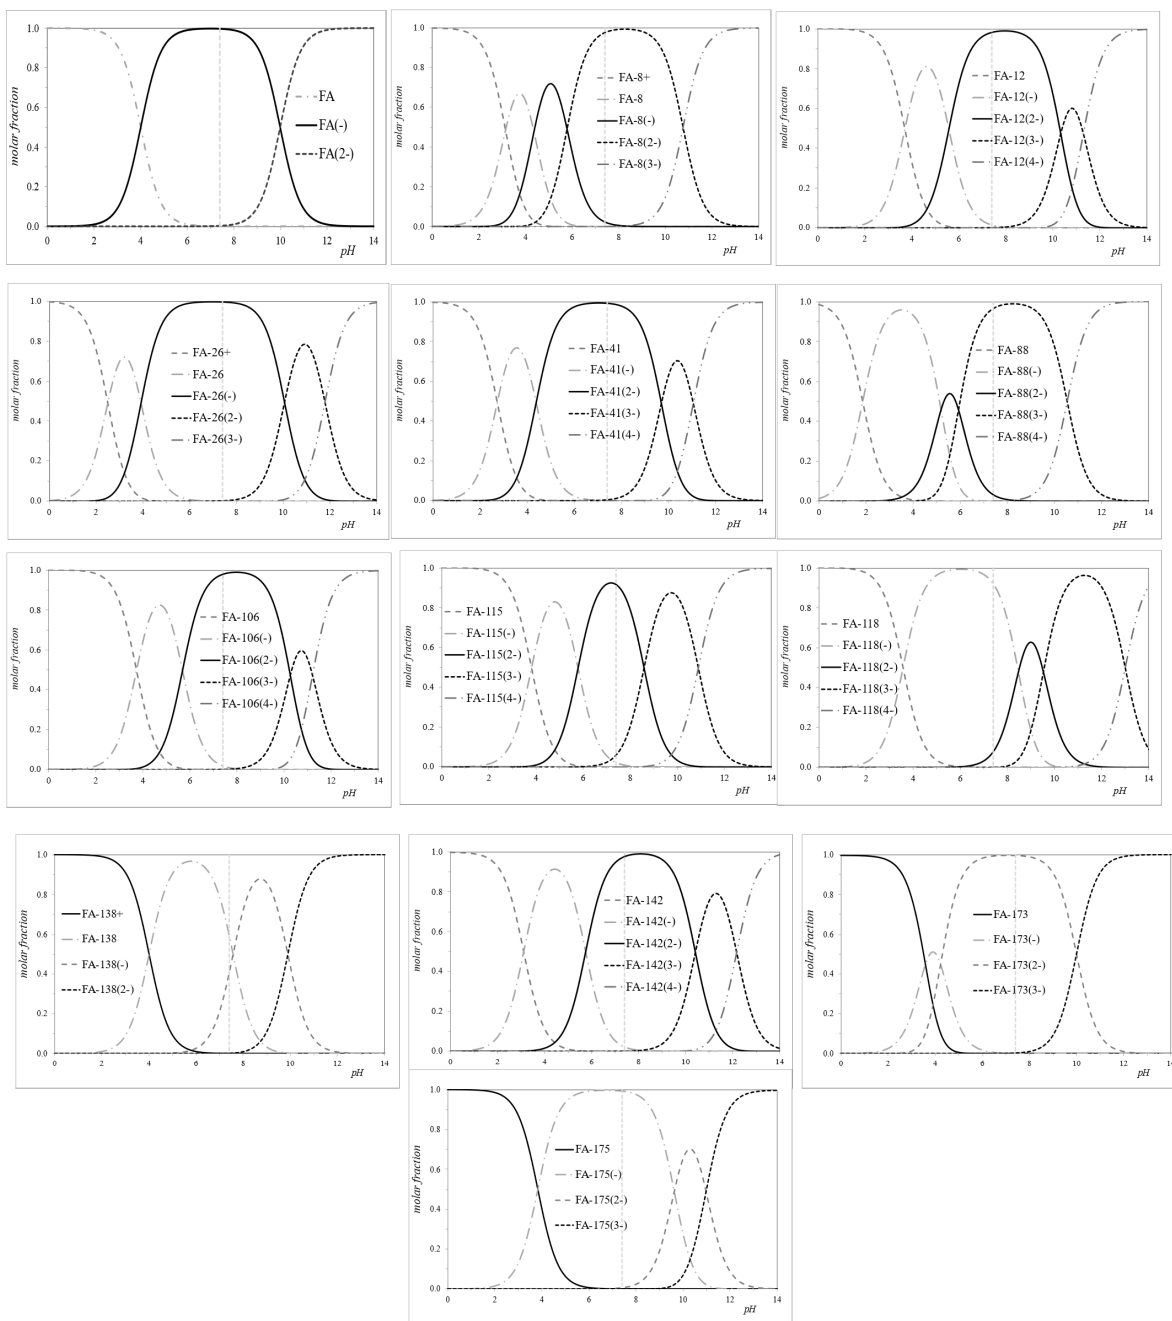

**Figure S4.** Distribution diagram of the acid-base species of ferulic acid derivatives. The vertical line landmarks the physiological pH (pH=7.4).
